# Supplementary material
Source: HighWire-hosted journal article supplement (https://rmdopen.bmj.com/content/10/1/e003739)
Supplement: inline-supplementary-material-1 [file inline-supplementary-material-1.pdf]

**Supplementary Table 1.** Definitions of pregnancy episodes and pregnancy outcomes

| Outcome                                                           |            | Category        | Codes                                                                                |
|-------------------------------------------------------------------|------------|-----------------|--------------------------------------------------------------------------------------|
| <i>Used for the definition of pregnancy episodes and outcomes</i> |            |                 |                                                                                      |
| Delivery                                                          |            | Procedure code  | R313, R314, R435, R436, R438, R450, R451, R4520, R4522, R500, RA31, RA36, RA38, RA43 |
| APO                                                               | Abortion   | Diagnostic code | O01~08                                                                               |
|                                                                   | Stillbirth | Diagnostic code | Z37.1, Z37.3, Z37.4, Z37.6, Z37.7, O36.4                                             |
| <i>Used for the definition of pregnancy episodes only</i>         |            |                 |                                                                                      |
| Pregnancy confirmation                                            |            | Diagnostic code | Z32.1, Z33, Z34, Z35                                                                 |
| Abortion                                                          |            | Procedure code  | R4441, R4442, R4452, R4453, R4456, R4457, R4458, R4459                               |

APO, Adverse pregnancy outcome.

**Supplementary Table 2.** Additional baseline characteristics of the study population at the date of conception

| <b>Variables</b>         | <b>All pregnancies<br/>(n = 5,728)</b> | <b>Delivery<br/>(n = 4,576)</b> | <b>APO<br/>(n = 1,152)</b> | <b>P</b> |
|--------------------------|----------------------------------------|---------------------------------|----------------------------|----------|
| <b>Age group, years</b>  |                                        |                                 |                            | < 0.001  |
| 20~29                    | 857 (15.0%)                            | 743 (16.2%)                     | 114 (9.9%)                 |          |
| 30~39                    | 4,375 (76.4%)                          | 3,585 (78.3%)                   | 790 (68.6%)                |          |
| 40~49                    | 496 (8.7%)                             | 248 (5.4%)                      | 248 (21.5%)                |          |
| <b>Year of pregnancy</b> |                                        |                                 |                            | 0.159    |
| 2011                     | 414 (7.2)                              | 344 (7.5)                       | 70 (6.1)                   |          |
| 2012                     | 460 (8.0)                              | 366 (8.0)                       | 94 (8.2)                   |          |
| 2013                     | 642 (11.2)                             | 524 (11.5)                      | 118 (10.2)                 |          |
| 2014                     | 709 (12.4)                             | 560 (12.2)                      | 149 (12.9)                 |          |
| 2015                     | 755 (13.2)                             | 625 (13.7)                      | 130 (11.3)                 |          |
| 2016                     | 700 (12.2)                             | 551 (12.0)                      | 149 (12.9)                 |          |
| 2017                     | 693 (12.1)                             | 547 (12.0)                      | 146 (12.7)                 |          |
| 2018                     | 690 (12.0)                             | 542 (11.8)                      | 148 (12.8)                 |          |
| 2019                     | 665 (11.6)                             | 517 (11.3)                      | 148 (12.8)                 |          |
| <b>Region</b>            |                                        |                                 |                            | 0.275    |
| Seoul                    | 1,065 (18.6)                           | 849 (18.6)                      | 216 (18.8)                 |          |
| Metropolitan city        | 1,278 (22.3)                           | 1,041 (22.7)                    | 237 (20.6)                 |          |
| Others                   | 3,385 (59.1)                           | 2,686 (58.7)                    | 699 (60.7)                 |          |

Data are presented as numbers with percentages (%) or mean  $\pm$  standard deviations.

APO, Adverse pregnancy outcome; RA, Rheumatoid arthritis; CCI, Charlson comorbidity index.

**Supplementary Table 3.** Factors associated with APOs versus delivery in patients with RA (only including first pregnancies)

| Variables                                                     | Multivariable analysis<br>(n = 3,037) |         |
|---------------------------------------------------------------|---------------------------------------|---------|
|                                                               | Adjusted OR<br>(95% CI)               | P       |
| Age group, years (ref: 20~29)                                 |                                       |         |
| 30~39                                                         | 1.25 (0.96–1.64)                      | 0.100   |
| 40~49                                                         | 5.42 (3.91–7.52)                      | < 0.001 |
| Type of insurance (ref: NHI)                                  | 1.15 (0.51–2.59)                      | 0.732   |
| Type of institution (ref: tertiary referral hospital)         |                                       |         |
| General hospital                                              | 0.82 (0.62–1.07)                      | 0.142   |
| Community hospital/clinic                                     | 1.41 (1.12–1.78)                      | 0.003   |
| Income group (ref: 1 <sup>st</sup> quartile)                  |                                       |         |
| 2 <sup>nd</sup> quartile                                      | 0.74 (0.55–1.00)                      | 0.047   |
| 3 <sup>rd</sup> quartile                                      | 0.91 (0.70–1.19)                      | 0.486   |
| 4 <sup>th</sup> quartile                                      | 0.74 (0.55–1.00)                      | 0.052   |
| Seropositivity (ref: seronegative)                            | 0.93 (0.74–1.17)                      | 0.527   |
| CCI score                                                     | 1.08 (0.98–1.19)                      | 0.134   |
| Any hospital visit for RA during early pregnancy <sup>a</sup> | 0.92 (0.70–1.22)                      | 0.559   |
| Conventional synthetic DMARD <sup>b</sup>                     |                                       |         |
| Methotrexate use (ref: not use)                               | 2.11 (1.38–3.21)                      | < 0.001 |
| Leflunomide use (ref: not use)                                | 2.06 (0.91–4.67)                      | 0.082   |
| Hydroxychloroquine use (ref: not use)                         | 1.16 (0.87–1.55)                      | 0.320   |
| Sulfasalazine use (ref: not use)                              | 0.95 (0.64–1.41)                      | 0.791   |
| Tacrolimus use (ref: not use)                                 | 1.00 (0.47–2.14)                      | 0.991   |
| NSAIDs use <sup>b</sup> (ref: not use)                        | 1.15 (0.88–1.48)                      | 0.306   |
| Oral GC use <sup>b</sup> (ref: not use)                       | 1.01 (0.81–1.26)                      | 0.933   |
| Targeted therapy <sup>b</sup> (ref: not use)                  | 1.11 (0.65–1.89)                      | 0.712   |

<sup>a</sup> The first 12 weeks from conception

<sup>b</sup> Medication use in the 3 months prior to conception

APO, Adverse pregnancy outcome; RA, Rheumatoid arthritis; OR, Odds ratio; CI, Confidence interval; NHI, National health insurance; CCI, Charlson comorbidity index; DMARD, disease-modifying anti-rheumatic drug; NSAID, Nonsteroidal anti-inflammatory drug; GC, Glucocorticoid.

**Supplementary Table 4.** Factors associated with APOs versus delivery in patients with RA (including missing data)

| Variables                                                     | Multivariable analysis<br>(n = 5,728) |         |
|---------------------------------------------------------------|---------------------------------------|---------|
|                                                               | Adjusted OR<br>(95% CI)               | P       |
| Age group, years (ref: 20~29)                                 |                                       |         |
| 30~39                                                         | 1.34 (1.08–1.66)                      | 0.009   |
| 40~49                                                         | 5.32 (4.14–6.84)                      | < 0.001 |
| Type of insurance (ref: NHI)                                  | 1.40 (0.72–2.71)                      | 0.320   |
| Type of institution (ref: tertiary referral hospital)         |                                       |         |
| General hospital                                              | 0.93 (0.77–1.12)                      | 0.418   |
| Community hospital/clinic                                     | 1.33 (1.13–1.56)                      | < 0.001 |
| Income group (ref: 1 <sup>st</sup> quartile)                  |                                       |         |
| 2 <sup>nd</sup> quartile                                      | 0.78 (0.63–0.97)                      | 0.026   |
| 3 <sup>rd</sup> quartile                                      | 0.87 (0.71–1.06)                      | 0.152   |
| 4 <sup>th</sup> quartile                                      | 0.84 (0.68–1.04)                      | 0.117   |
| Missing                                                       |                                       |         |
| Seropositivity (ref: seronegative)                            | 0.96 (0.82–1.12)                      | 0.590   |
| CCI score                                                     | 1.05 (0.97–1.13)                      | 0.211   |
| Any hospital visit for RA during early pregnancy <sup>a</sup> | 0.95 (0.78–1.16)                      | 0.613   |
| Conventional synthetic DMARD <sup>b</sup>                     |                                       |         |
| Methotrexate use (ref: not use)                               | 2.08 (1.53–2.84)                      | < 0.001 |
| Leflunomide use (ref: not use)                                | 2.57 (1.35–4.90)                      | 0.004   |
| Hydroxychloroquine use (ref: not use)                         | 1.11 (0.90–1.37)                      | 0.326   |
| Sulfasalazine use (ref: not use)                              | 0.85 (0.63–1.14)                      | 0.279   |
| Tacrolimus use (ref: not use)                                 | 1.00 (0.60–1.65)                      | 0.991   |
| NSAIDs use <sup>b</sup> (ref: not use)                        | 1.16 (0.96–1.40)                      | 0.128   |
| Oral GC use <sup>b</sup> (ref: not use)                       | 0.95 (0.81–1.11)                      | 0.501   |
| Targeted therapy <sup>b</sup> (ref: not use)                  | 1.18 (0.79–1.76)                      | 0.417   |
| Multiple pregnancies (ref: one pregnancy)                     | 1.09 (0.95–1.25)                      | 0.214   |

<sup>a</sup> The first 12 weeks from conception

<sup>b</sup> Medication use in the 3 months prior to conception

APO, Adverse pregnancy outcome; RA, Rheumatoid arthritis; OR, Odds ratio; CI, Confidence interval; NHI, National health insurance; CCI, Charlson comorbidity index; DMARD, disease-modifying anti-rheumatic drug; NSAID, Nonsteroidal anti-inflammatory drug; GC, Glucocorticoid.

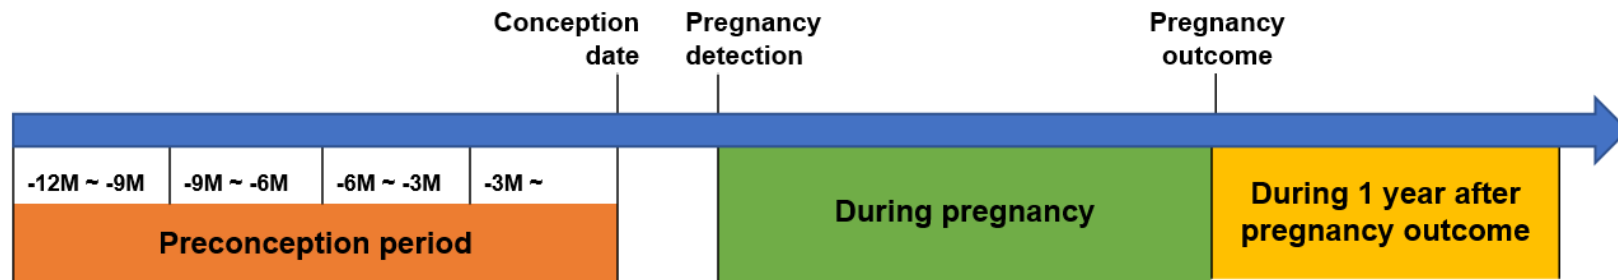

**Supplementary Figure 1.** Observation timeline of the study population
